# Supplementary material for: Synthesis of dibenzoxanthene and acridine derivatives catalyzed by 1,3-disulfonic acid imidazolium carboxylate ionic liquids
Source: Royal Society of Chemistry journal article supplement (doi:10.1039/c4ra07323a), 2014-01-01

## Synthesis of Dibenzoxanthene and Acridine Derivatives Catalyzed by 1,3-Disulfonic Acid Imidazolium Carboxylate Ionic Liquids

Arup Kumar Dutta, Pinky Gogoi and Ruli Borah\*

### Table of contents

General Information (page no. 2)

Spectral data of ionic liquids **1**, **2** and **3** (page no. 2)

Spectral data of new derivatives of 1,8-dioxo-decahydroacridine (**4**) and dibenzoxanthene (**5**) (page no. 3)

Soft copies <sup>1</sup>H NMR and <sup>13</sup>C NMR spectra of ionic liquids (page no. 4-9)

Soft copies of <sup>1</sup>H NMR and <sup>13</sup>C NMR spectra of 1,8-dioxo-decahydroacridine (**4**) and dibenzoxanthene (**5**) (page no. 10- 19)

## General Information

All chemicals were purchased from chemical suppliers and used without any purification. Thin layer chromatography was monitored on glass plate using Merck silica gel. The  $^1\text{H}$ NMR and  $^{13}\text{C}$ NMR were run on a JEOL 400 MHz spectrometer ( in ppm) in DMSO- $d_6$  and  $\text{CDCl}_3$  solvents. FT-IR spectra were recorded on a Nicolet Impact-410 spectrometer. The Hammett plot of the ILs was measured on an UV 2550 spectrophotometer using 4-nitroaniline as basic indicator. The  $pK_a$  of the ionic liquids were determined by digital pH meter 802. The thermal stability of the three ionic liquids was performed on Shimadzu TGA 50. Perkin Elmer 20 analyzer was utilized for elemental analysis of all compounds. Melting points were recorded on a Buchi-545 apparatus. The  $^1\text{H}$  NMR and  $^{13}\text{C}$  NMR spectra of new ionic liquids and selected dibenzoxanthene **4** and 1,8-dioxo-octahydroacridine derivatives **5** were included in supplementary file.

## Spectral data of ionic liquids **1**, **2** and **3**

[DISM][ $\text{CH}_3\text{COO}$ ] $^-$  (**1**): Light reddish oil, 98 % yield; FT-IR (KBr) : 3556, 3453, 3217, 1709, 1644, 1592, 1435, 1180, 1048, 878, 764, 586  $\text{cm}^{-1}$ ;  $^1\text{H}$  NMR(DMSO- $d_6$ , 400 MHz): 14.17(s, 1H), 11.30 (s, 1H), 8.91 (s,1H), 7.53(s, 2H),1.79 (s, 3H) ;  $^{13}\text{C}$  NMR (DMSO- $d_6$ , 100 MHz): 172.6, 134.7,119.8,21.5; CHN analysis(%):  $\text{C}_5\text{H}_8\text{O}_8\text{S}_2\text{N}_2$  ,Cal. C 20.83, H 2.80, N 9.70; Found C 20.91, H 2.84, N 9.73.

[DISM][ $\text{CCl}_3\text{COO}$ ] $^-$  (**2**): Dark reddish oil, 100 % yield; FT-IR (KBr): 3416, 3316, 1748, 1639, 1591, 1433, 1192, 1048, 876, 764, 688, 585  $\text{cm}^{-1}$ ;  $^1\text{H}$  NMR(DMSO- $d_6$ , 400 MHz): 14.2(s, 1H); 12.77 (s,1H), 8.87(s, 1H), 7.46(s, 2H),  $^{13}\text{C}$  NMR (DMSO- $d_6$ , 100 MHz): 163.05, 134.5, 120.03, 79.6 ;CHN analysis(%):  $\text{C}_5\text{H}_5\text{O}_8\text{S}_2\text{N}_2\text{Cl}_3$  ,Cal. C 15.35; H 1.27, N 7.15; Found C 15.38, H1.30, N 7.19.

[DSIM][ $\text{CF}_3\text{COO}$ ] $^-$  (**3**) : Reddish oil, 100 % yield; FT-IR (KBr) : 3531, 3420, 1751, 1640, 1588, 1432, 1178, 1054, 875, 765, 694, 587  $\text{cm}^{-1}$ ;  $^1\text{H}$  NMR(DMSO- $d_6$ , 400 MHz): 14.14(s, 1H), 13.42 (s,1H), 8.89(s, 1H), 7.48(s, 2H);  $^{13}\text{C}$  NMR (DMSO- $d_6$ , 100 MHz): 158.6, 134.2, 134.6, 119.7, 62.4 ; CHN analysis(%):  $\text{C}_5\text{H}_5\text{O}_8\text{S}_2\text{N}_2\text{F}_3$ , Cal. C 17.69, H 1.51, N 8.16; Found C17.72, H 1.54, N 8.19.

## Spectral data of new derivatives of 1,8-dioxo-decahydroacridine (4) and dibenzoxanthene (5)

[1] 3,4,6,7-Tetrahydro-3,3,6,6-tetramethylacridine-1,8(2*H*,5*H*,9*H*,10*H*)-dione (table 3, entry 6, **4f**, new ): White ; FT-IR (KBr)  $\text{cm}^{-1}$  : 3432, 2962, 2880, 1609, 1376, 1239, 1246, 1151, 1083, 1026, 873, 809 ;  $^1\text{H}$  NMR ( $\text{CDCl}_3$ , 400 MHz): 3.16 (s, 2H), 2.29(s, 8H), 1.05 (s, 12 H) ;  $^{13}\text{C}$  NMR ( $\text{CDCl}_3$ , 100 MHz) : 189.5, 113.5, 46.0, 31.8, 29.5, 27.1, 15.9; CHN analysis (%) :  $\text{C}_{17}\text{H}_{23}\text{NO}_2$ , Cal. C 74.73, H 8.42, N 5.13 ; Found C 74.71, H 8.44, N 5.15.

[2] Decahydro-3,3,6,6-tetramethyl-9-(naphthalen-2-yl)acridine-1,8(5*H*,8*aH*)-dione (table 3, entry 7, **4g**, new ): Grey ; FT-IR (KBr)  $\text{cm}^{-1}$  : 3768, 2956, 2875, 1666, 1462, 1361, 1195, 1144, 999, 928, 800, 698;  $^1\text{H}$  NMR ( $\text{CDCl}_3$ , 400 MHz): 8.81(s, 1H), 7.75(d,  $J=8.2\text{Hz}$ , 1H), 7.62-7.60(m, 2H), 7.44(m, 1H), 7.30 (m, 1H), 7.20(s, 1H), 5.52(s, 1H), 2.5(s, 4H), 2.22-2.06(m, 4H), 1.19(s, 6H), 0.95 (s, 6H);  $^{13}\text{C}$  NMR ( $\text{CDCl}_3$ , 100 MHz) : 196.7, 162.2, 133.6, 131.7, 128.2, 127.5, 125.9, 125.7, 124.9, 116.9, 50.7, 41.0, 32.3, 29.4, 27.4; CHN analysis (%) :  $\text{C}_{27}\text{H}_{29}\text{NO}_2$ , Cal. C 81.2, H 7.27, N 3.51; Found C 81.18, H 7.3, N 3.50.

[3] 3,4,6,7-Tetrahydro-3,3,6,6-tetramethyl-9-styrylacridine-1,8 ( 2*H*,5*H*,9*H*,10*H*)-dione (table 3, entry 8, **4h** ): Grey ; FT-IR (KBr)  $\text{cm}^{-1}$  : 3429, 2934, 1640, 1628, 1540, 1392, 1078, 1026, 874, 773;  $^1\text{H}$  NMR ( $\text{CDCl}_3$ , 400 MHz): 7.22-7.27 (m, 5H), 6.27-6.31(m, 2H), 4.41(d,  $J= 5.5\text{Hz}$ , 1H), 2.44(s, 4H), 2.29(s, 4H), 1.12(s, 12H);  $^{13}\text{C}$  NMR ( $\text{CDCl}_3$ , 100 MHz) : 196.5, 163.1, 137.2, 131.3, 130.4, 128.3, 127.1, 126.3, 50.8, 40.9, 32.2, 29.2, 27.9, 27.6; CHN analysis (%) :  $\text{C}_{25}\text{H}_{29}\text{NO}_2$ , Cal. C 80, H 7.73, N 3.73; Found C 80.12, H 7.76, N 3.75.

[4] 14-Dihydro-dibenzo[a,j] xanthene (table 4, entry 6, **5f**, new ): White ; FT-IR (KBr)  $\text{cm}^{-1}$  : 3057, 1589, 1510, 1455, 1396, 1240, 1171, 1069, 955, 854, 802, 744;  $^1\text{H}$  NMR ( $\text{CDCl}_3$ , 400 MHz): 8.02 (d,  $J=8.2\text{Hz}$ , 2H), 7.85(d,  $J=7.8\text{Hz}$ , 2H), 7.76(d,  $J=9.2\text{Hz}$ , 2H), 7.63(m, 2H), 7.46(t,  $J=7.3\text{Hz}$ , 2H), 7.31(d,  $J=8.7\text{Hz}$ , 2H), 4.56(s, 2H) ;  $^{13}\text{C}$  NMR ( $\text{CDCl}_3$ , 100 MHz) : 147.9, 132.2, 130.2, 128.5, 128.4, 126.8, 124.2, 122.4, 117.8, 111.0, 22.4; CHN analysis (%) :  $\text{C}_{21}\text{H}_{14}\text{O}$ , Cal. C 89.36, H 4.97; Found C 89.38, H 5.01.

[5] 14-Naphthyl-14*H*-dibenzo [a,j] xanthene( table 4, entry 7, **5g**, new ) : Brown solid ; FT-IR (KBr)  $\text{cm}^{-1}$  : 3058, 2378, 1591, 1509, 1398, 1356, 1242, 1158, 1070, 959, 807, 739;  $^1\text{H}$  NMR ( $\text{CDCl}_3$ , 400 MHz): 8.47 (d,  $J=8.7\text{Hz}$ , 2H), 8.01 (s, 1H), 7.75-7.78(m, 5H), 7.48-7.58(m, 7H), 7.27-7.37(m, 4 H), 6.63(s, 1H);  $^{13}\text{C}$  NMR ( $\text{CDCl}_3$ , 100 MHz) : 148.7, 142.3, 133, 132, 131.1, 128.9, 128.8, 127.8, 127.4, 126.8, 126.5, 124.2, 122.7, 117.9, 117, 38.3; CHN analysis (%) :  $\text{C}_{31}\text{H}_{20}\text{O}$ , Cal. C, 91.18, H 4.9; Found C 91.16, H 4.93.

# Spectra of ionic liquids:

$^1\text{H}$  NMR

[DSIM][CH<sub>3</sub>COO]<sup>-</sup> **1**

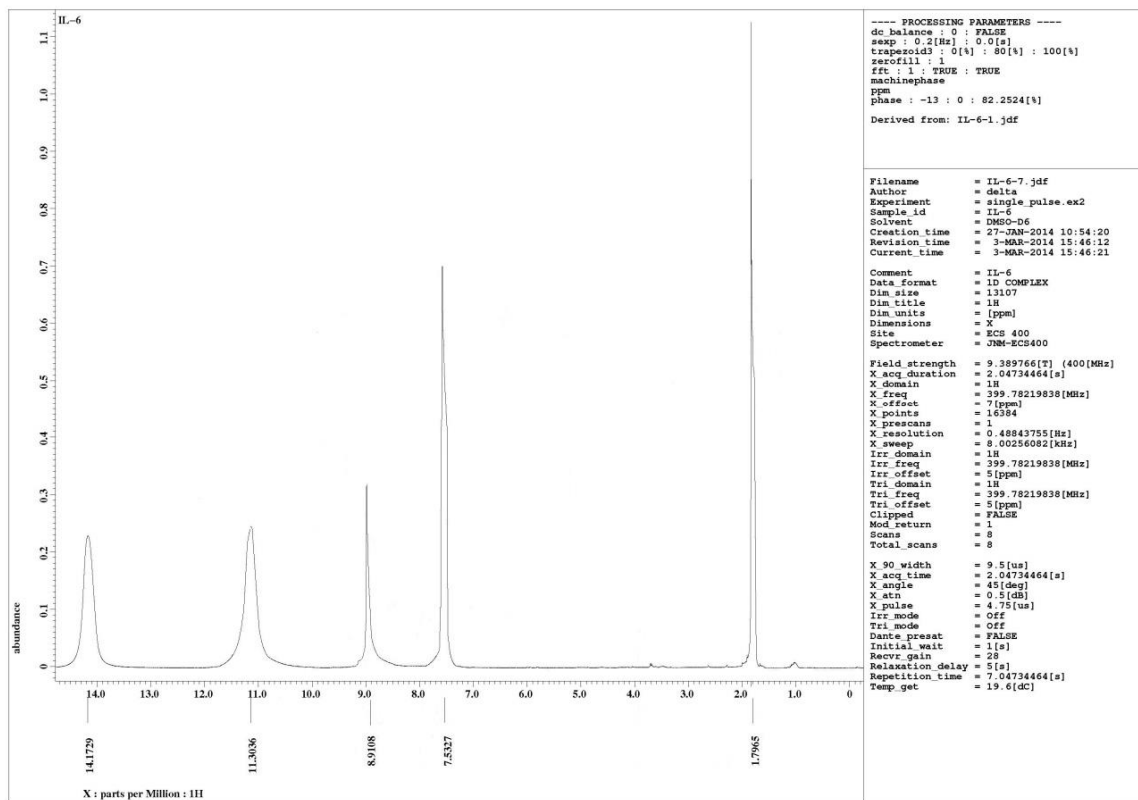

<sup>13</sup>C NMR

[DSIM][CH<sub>3</sub>COO]<sup>-</sup> 1

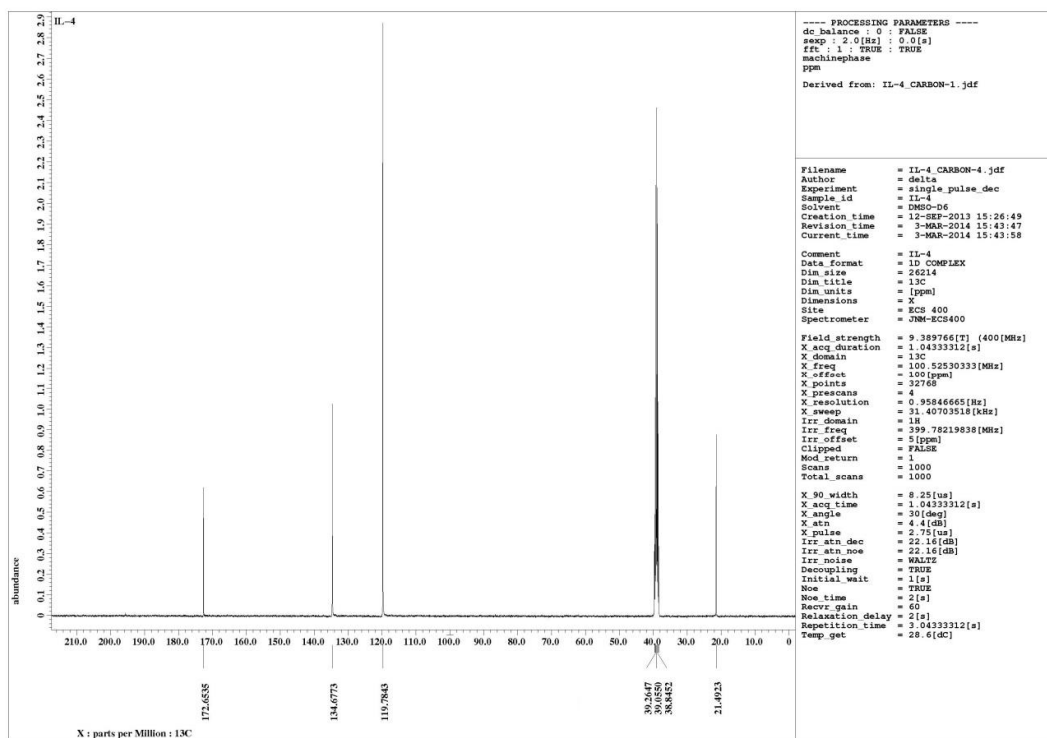

<sup>1</sup>H NMR

[DSIM][CCl<sub>3</sub>COO]<sup>-</sup> 2

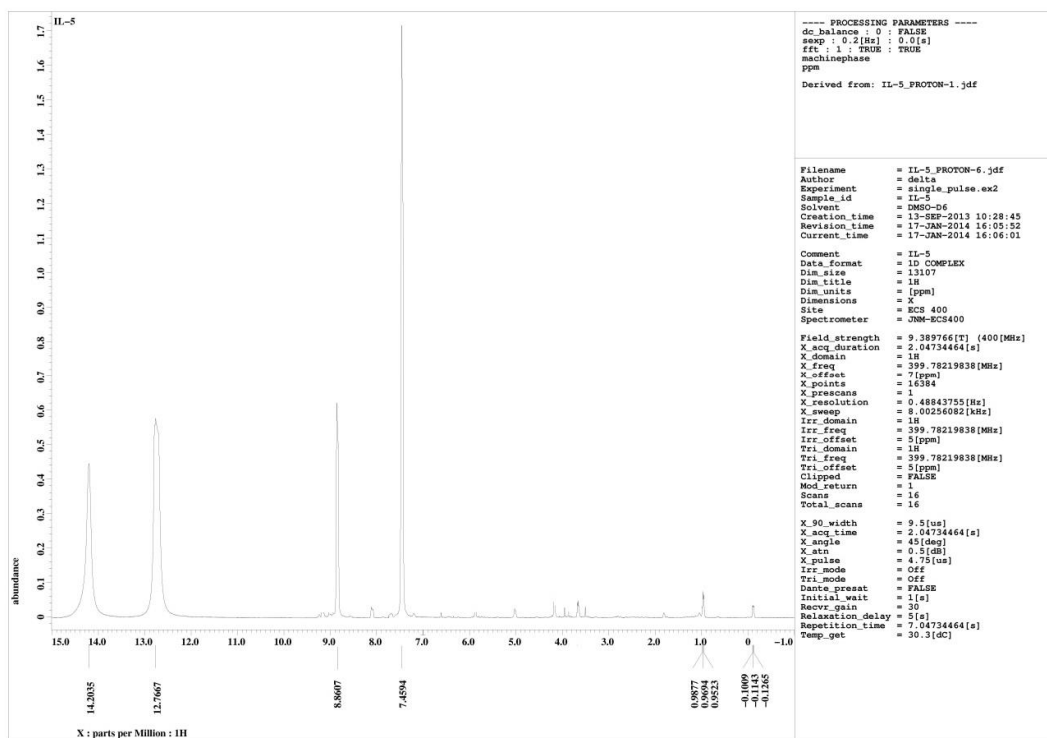

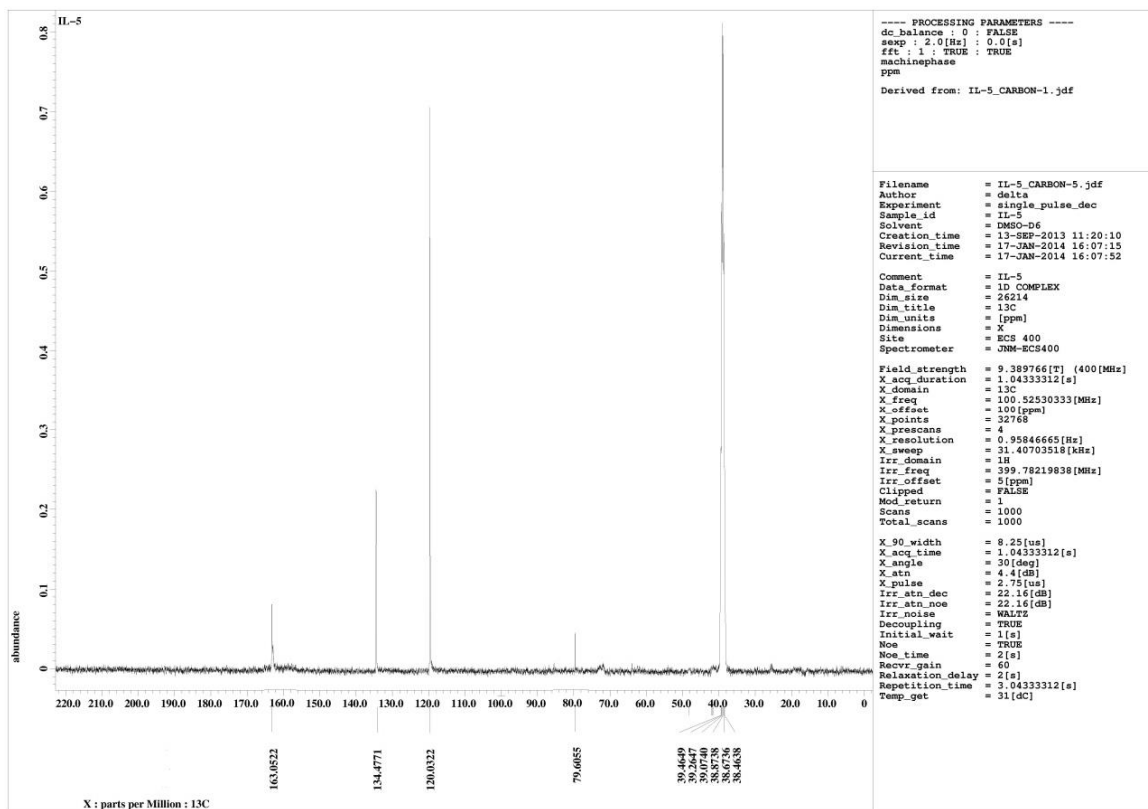

<sup>1</sup>H NMR

[DSIM][CF<sub>3</sub>COO] 3

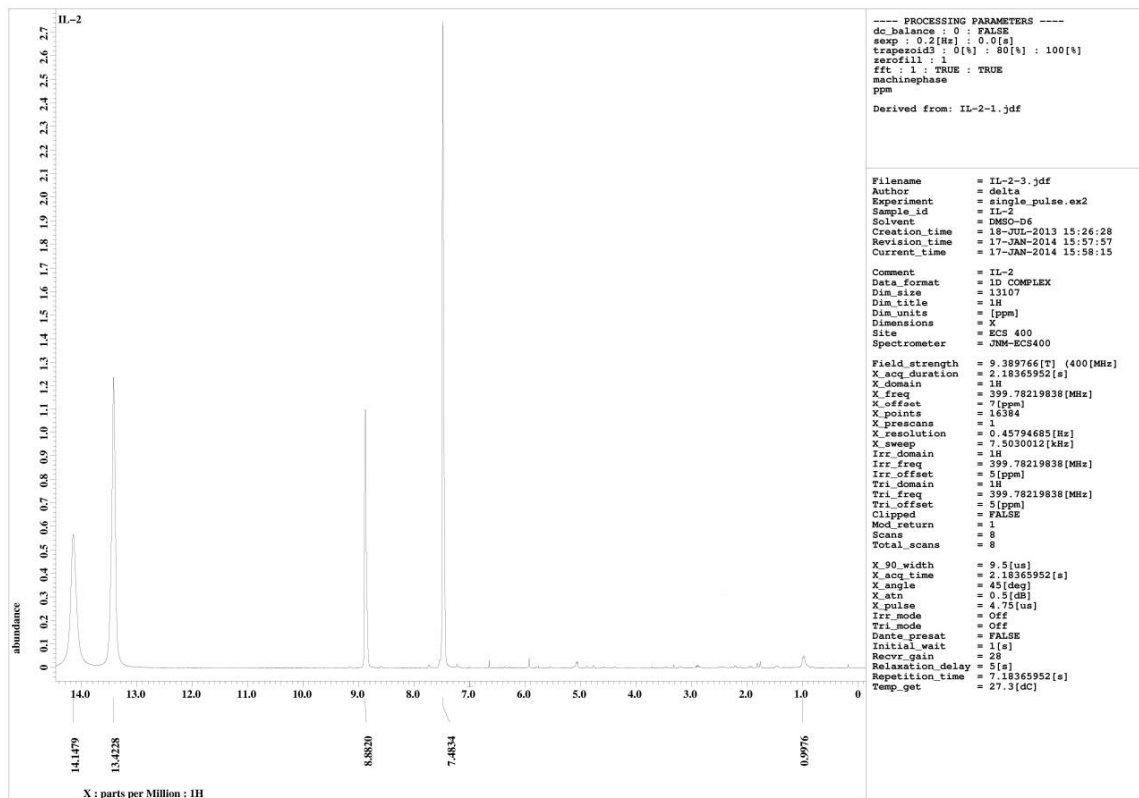



<sup>13</sup>C NMR

[DSIM][CF<sub>3</sub>COO]<sup>-</sup>

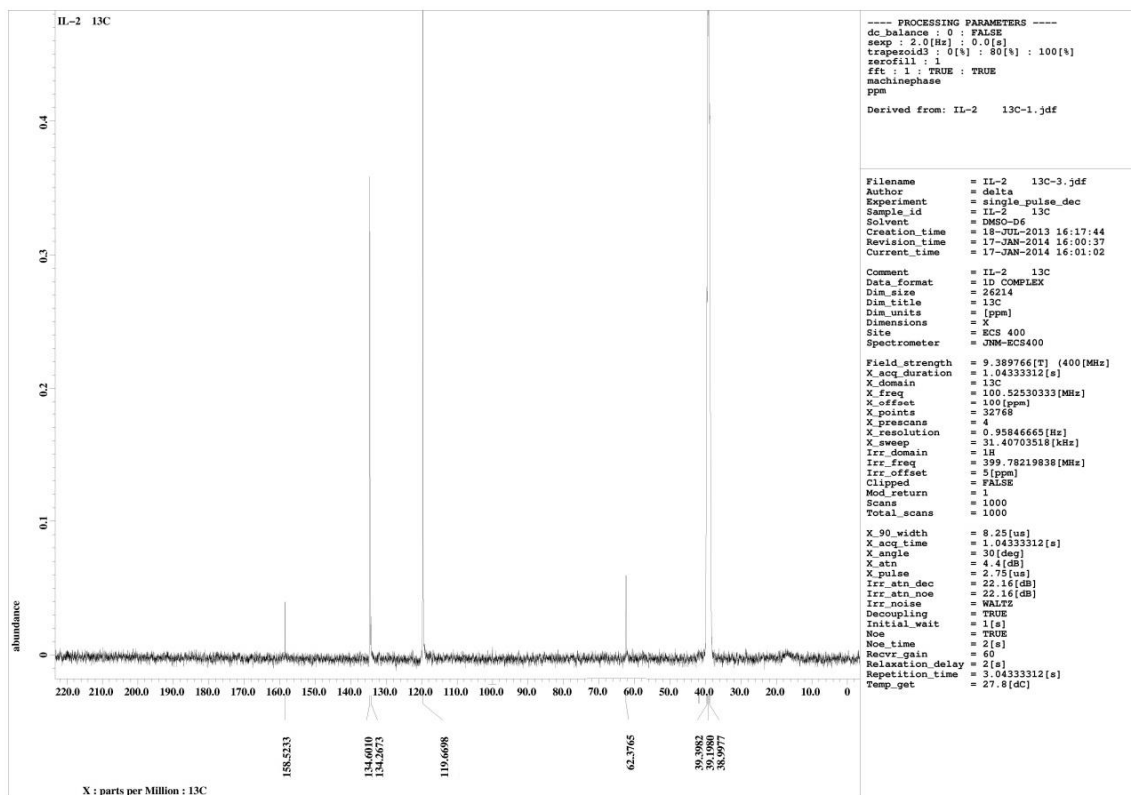

# Spectra of 1, 8-dioxooctahydroacridine 4 and dibenzoxanthene derivatives 5 :

Table 3, entry 6 **4f**

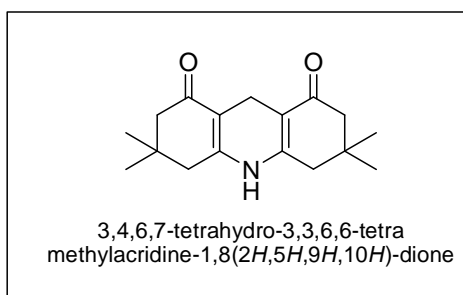

<sup>1</sup>H-NMR

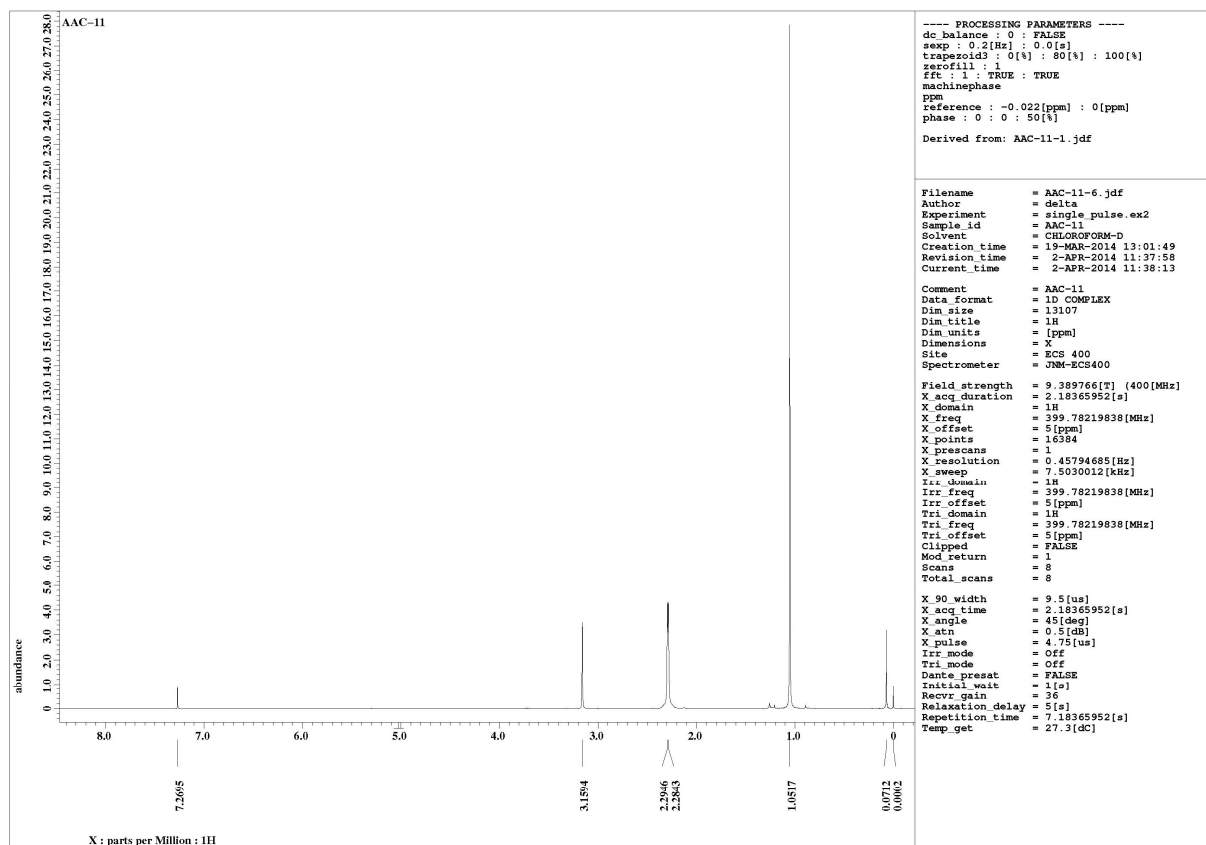

<sup>13</sup>C-NMR

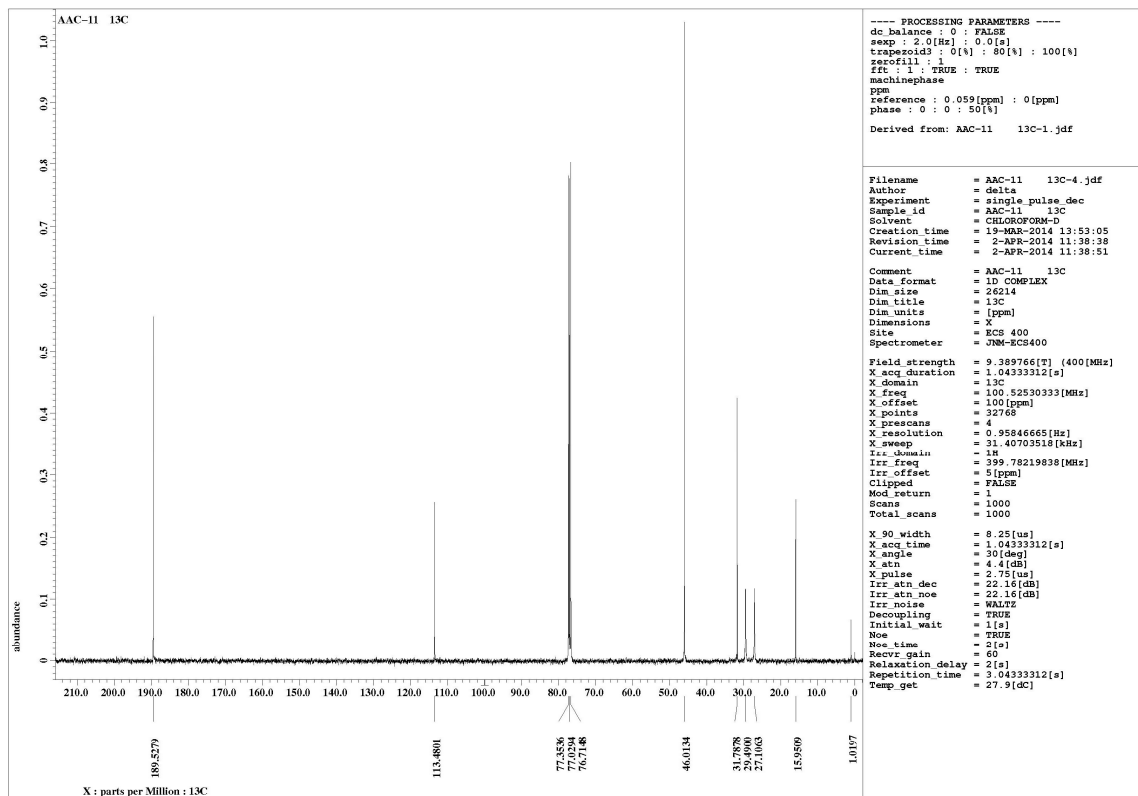

Table 3, entry 7 **4g**

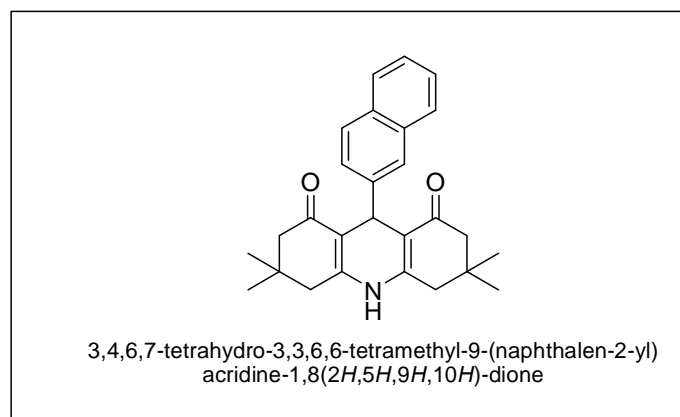

<sup>1</sup>H-NMR

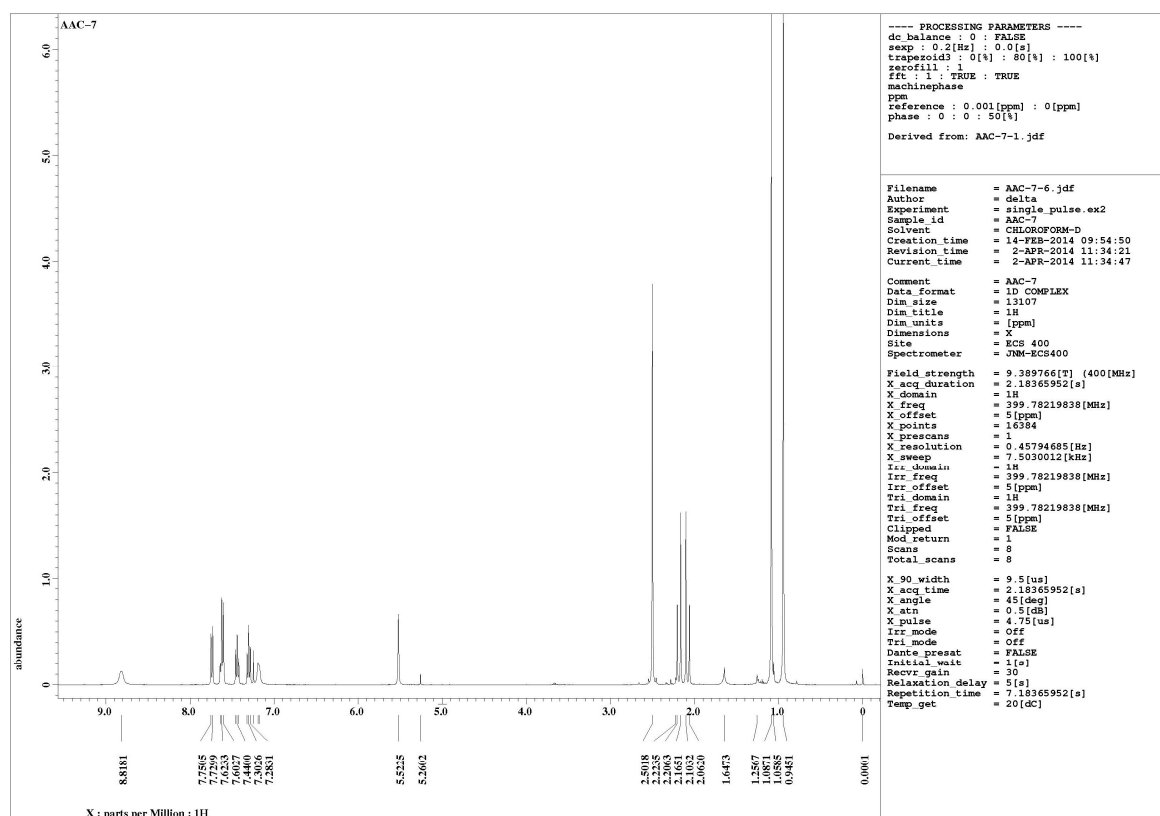

<sup>13</sup>C-NMR

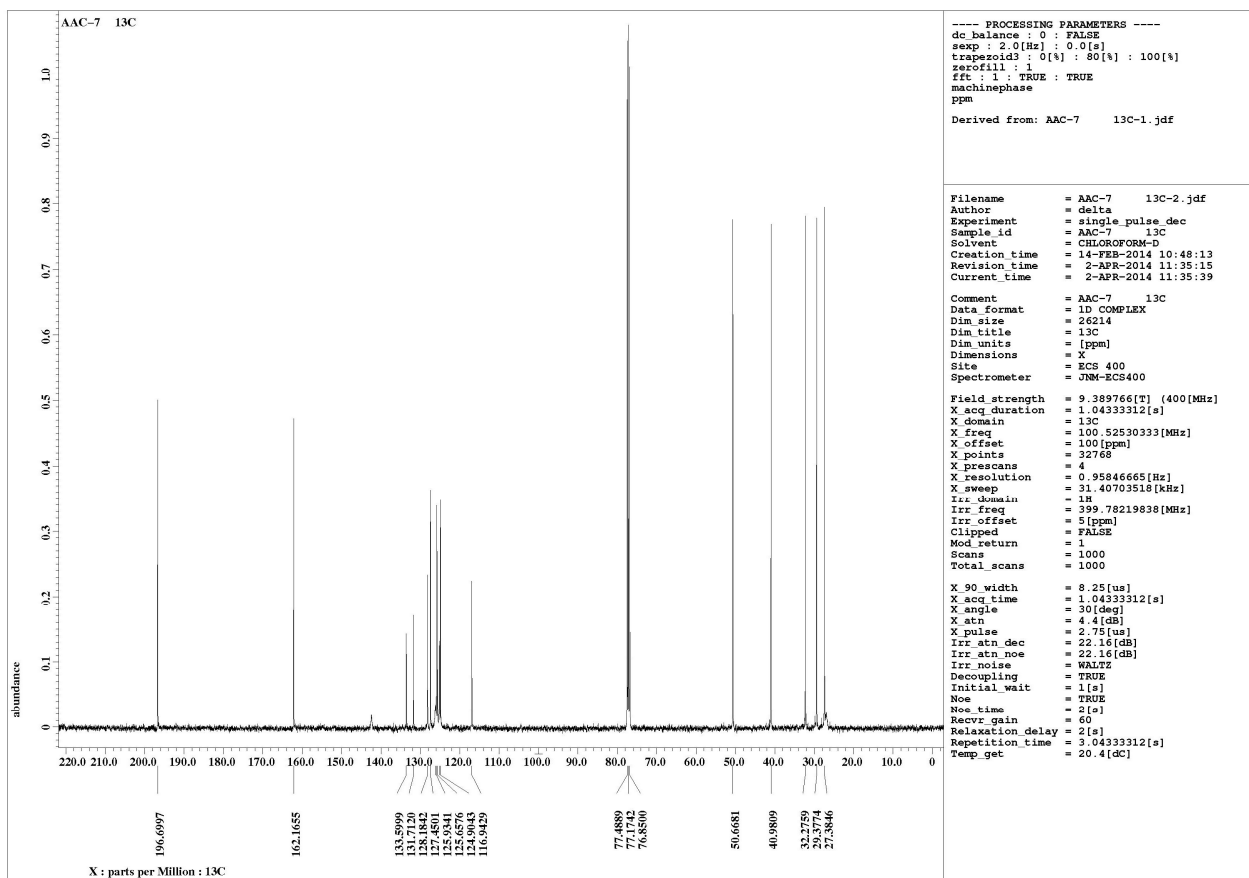

Table 3, entry 8, **4h**

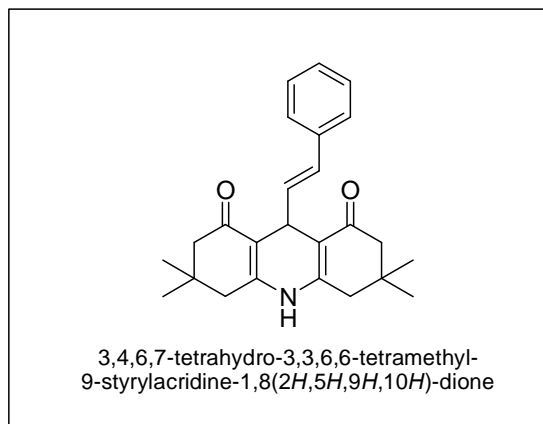

<sup>1</sup>H-NMR

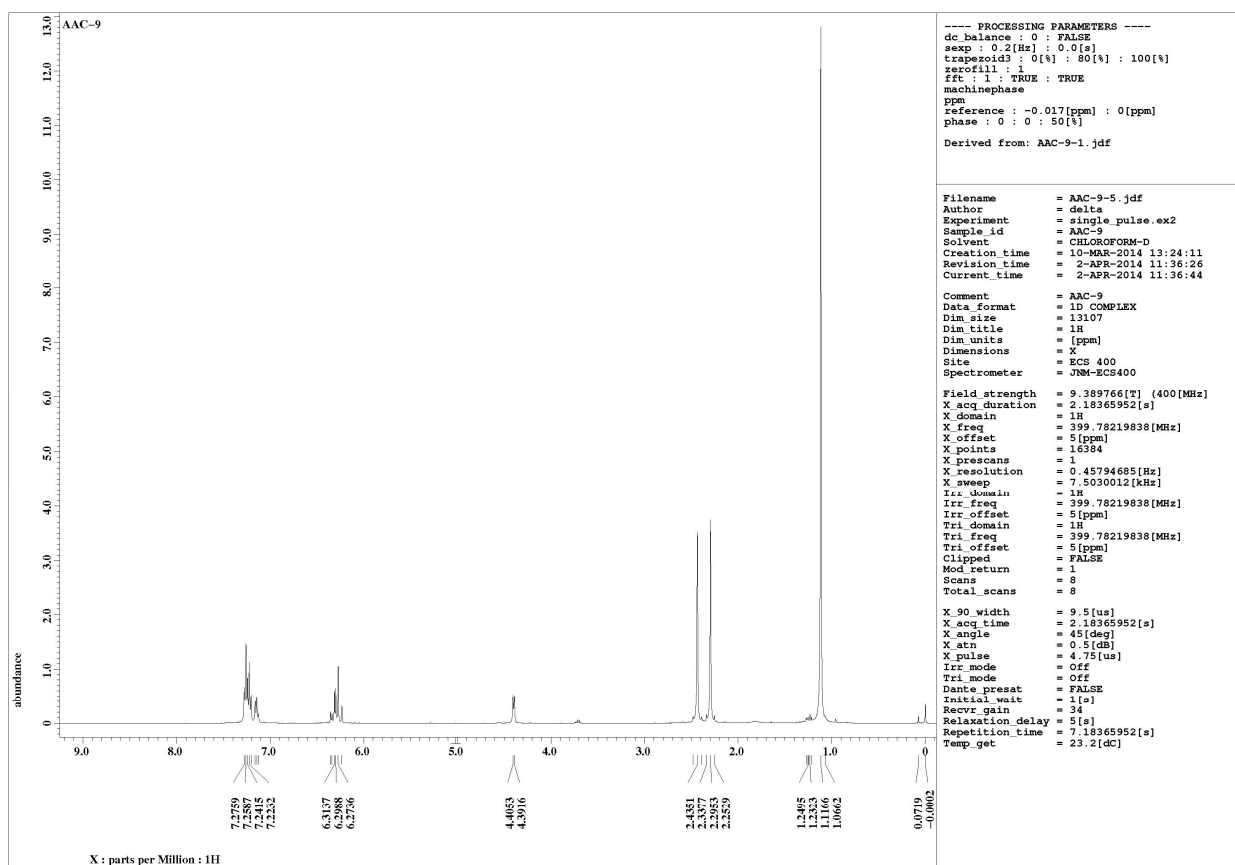

<sup>13</sup>C-NMR

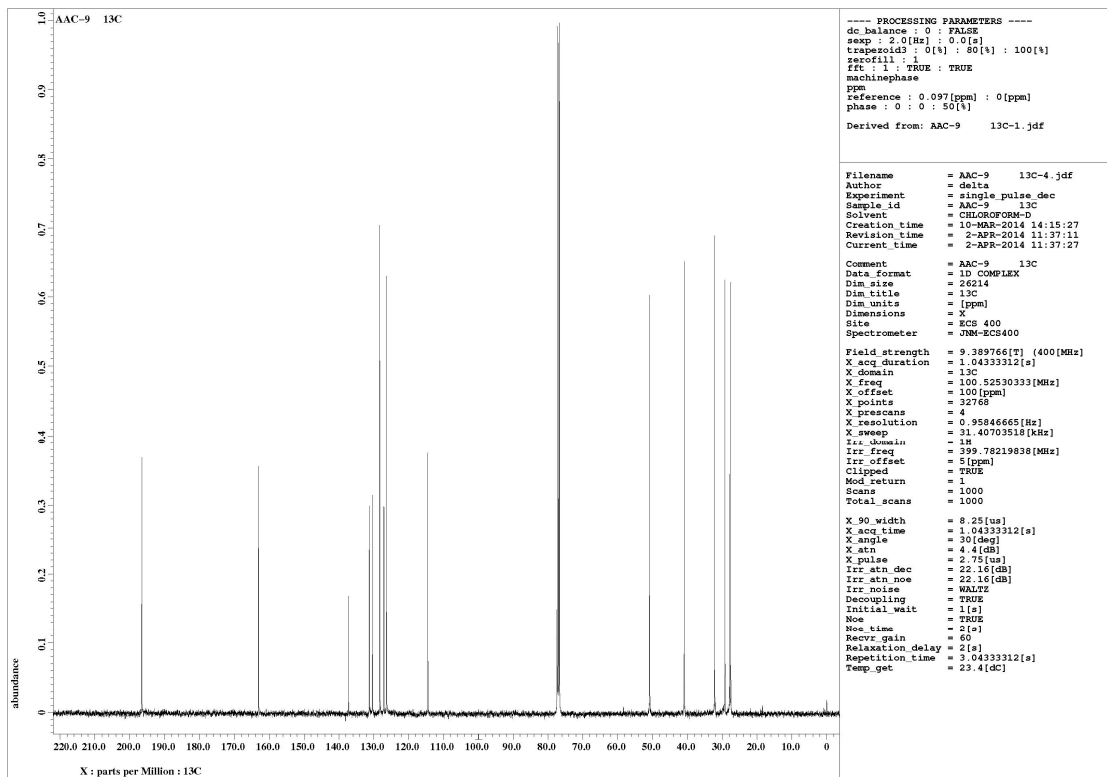

Table 4, entry 6, 5f

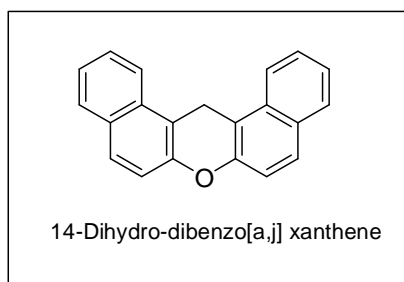

<sup>1</sup>H-NMR

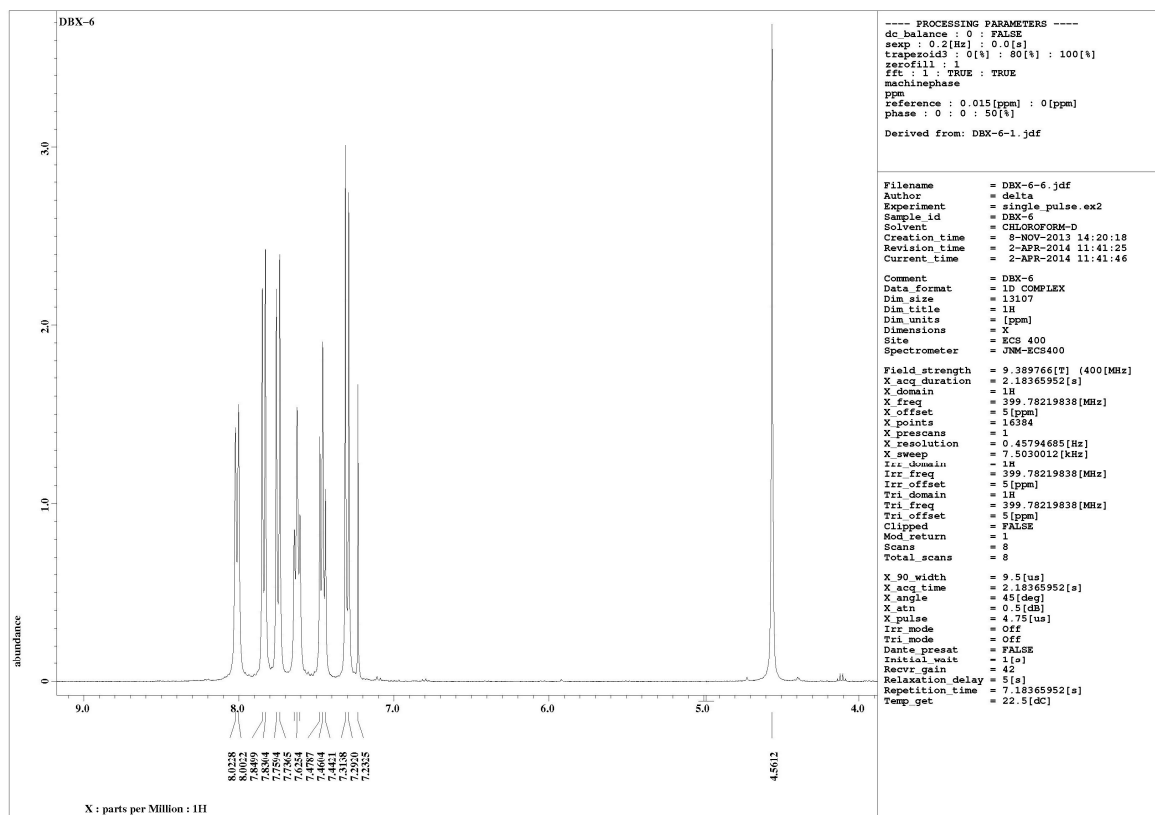



<sup>13</sup>C-NMR

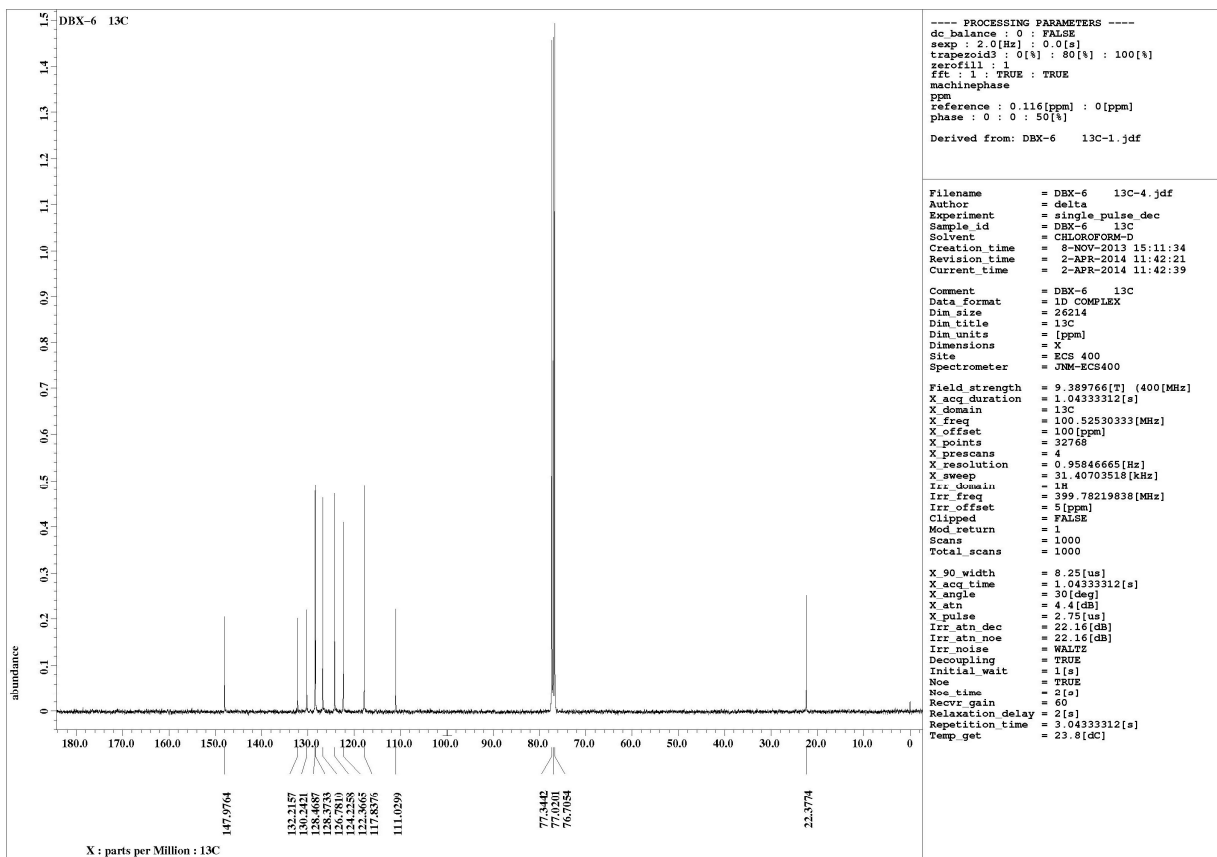

Table 4, entry 7, 5g

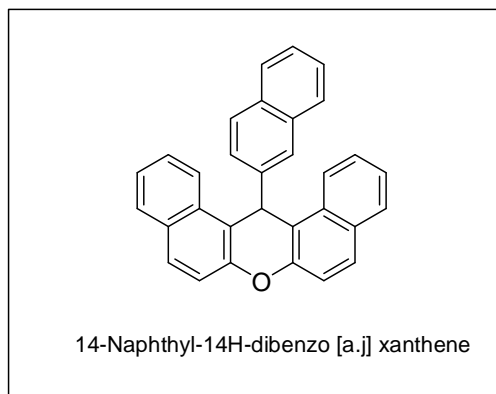

<sup>1</sup>H-NMR

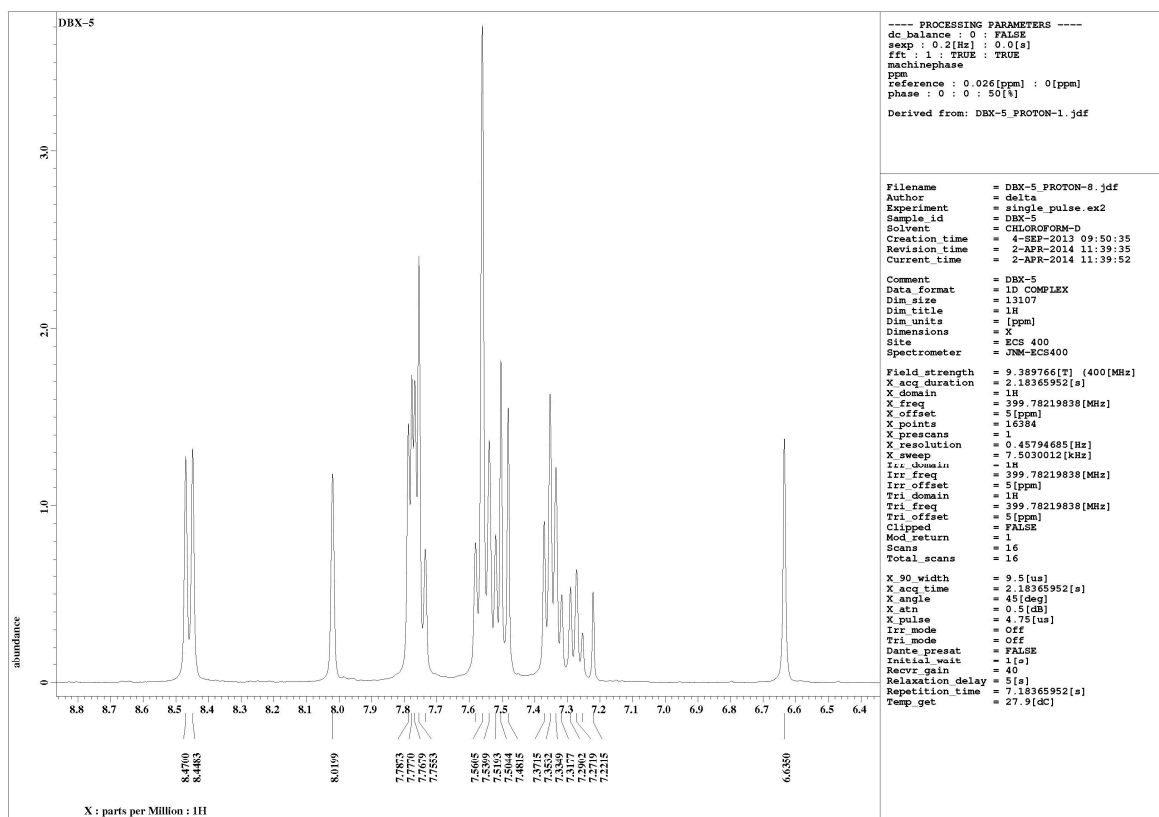

<sup>13</sup>C-NMR

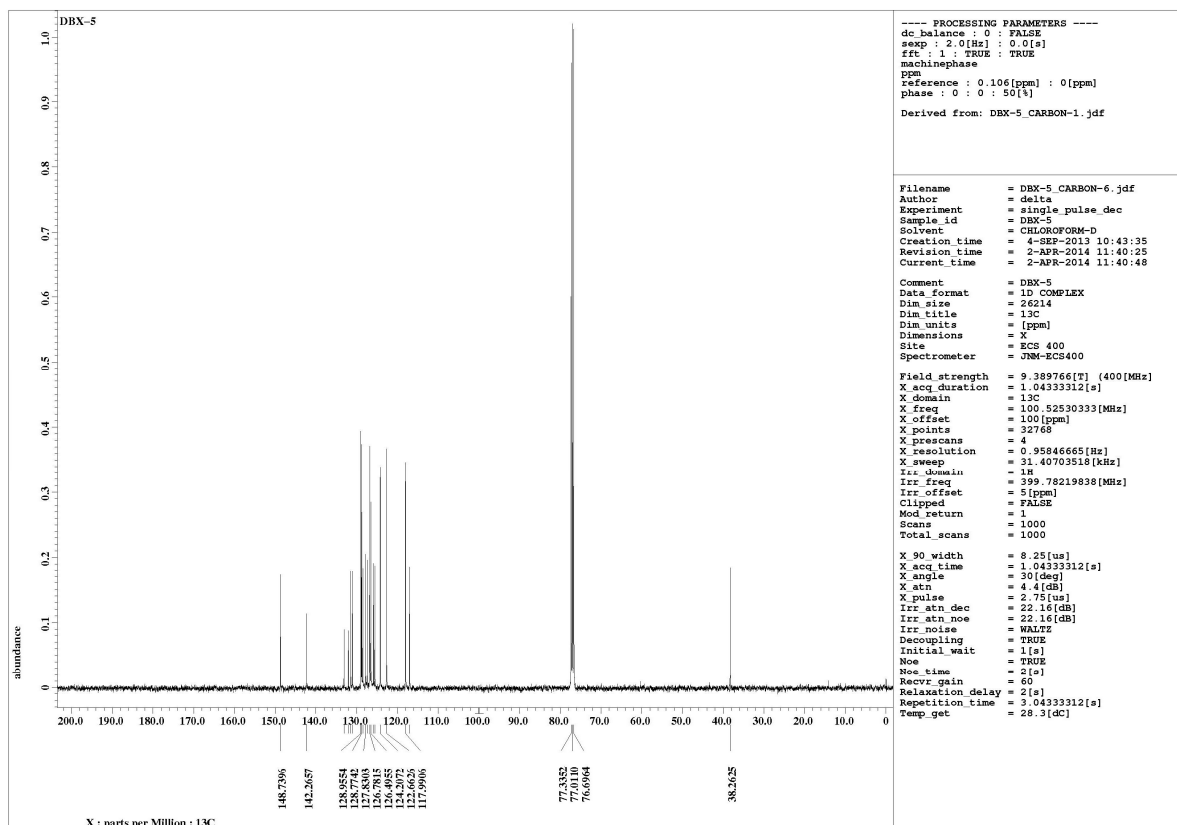

Supplement: c4ra07323a1.pdf [file c4ra07323a1.pdf]
